# Supplementary material
Source: Springer Nature journal article supplement (https://www.springermedizin.de/resource/supplementary/12936_2006_365_MOESM1_ESM.pdf/9547650)

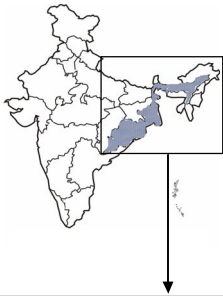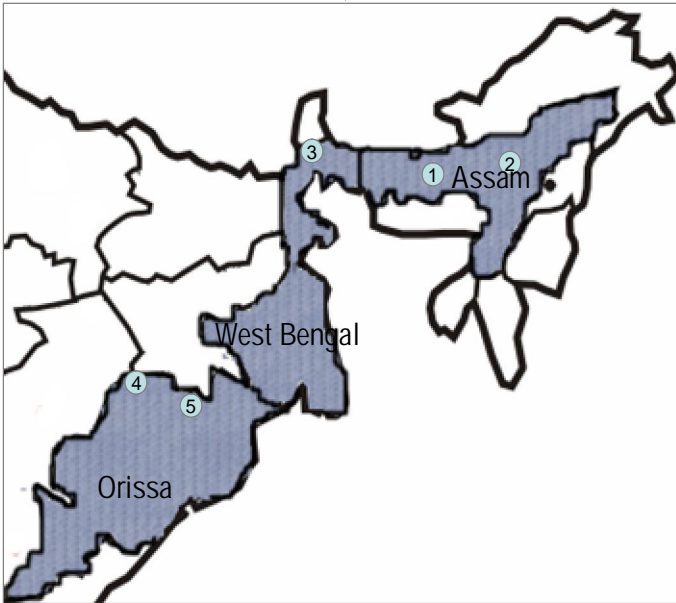

Kamrup<sup>1</sup>

Karbi Anglong<sup>2</sup>

Darjeeling<sup>3</sup>

Sundergarh<sup>4</sup>

Keonjhar<sup>5</sup>

Supplement: MOESM1 [file 9547650]
